# Supplementary material for: Developing energy efficient lignin biomass processing – towards understanding mediator behaviour in ionic liquids
Source: Royal Society of Chemistry journal article supplement (doi:10.1039/c5fd00226e), 2016-01-01
Supplement: c5fd00226e1.pdf [file c5fd00226e1.pdf]

## Developing Energy Efficient Lignin Biomass Processing – Towards Understanding Mediator Behaviour in Ionic Liquids

Majd Eshtaya,<sup>a</sup> Andinet Ejigu,<sup>b</sup> Gill Stephens,<sup>a</sup> Darren A. Walsh,<sup>b</sup> George Z. Chen<sup>a, c</sup> and Anna K. Croft<sup>a</sup>

- a. Department of Chemical and Environmental Engineering, Faculty of Engineering, University of Nottingham, Nottingham NG7 2RD, UK  
b. Department of Chemistry, University of Nottingham, Nottingham NG7 2RD, UK  
c. Department of Chemical and Environmental Engineering, Faculty of Science & Engineering, University of Nottingham Ningbo China, Ningbo 315100, P. R. China

### Supplemental Information

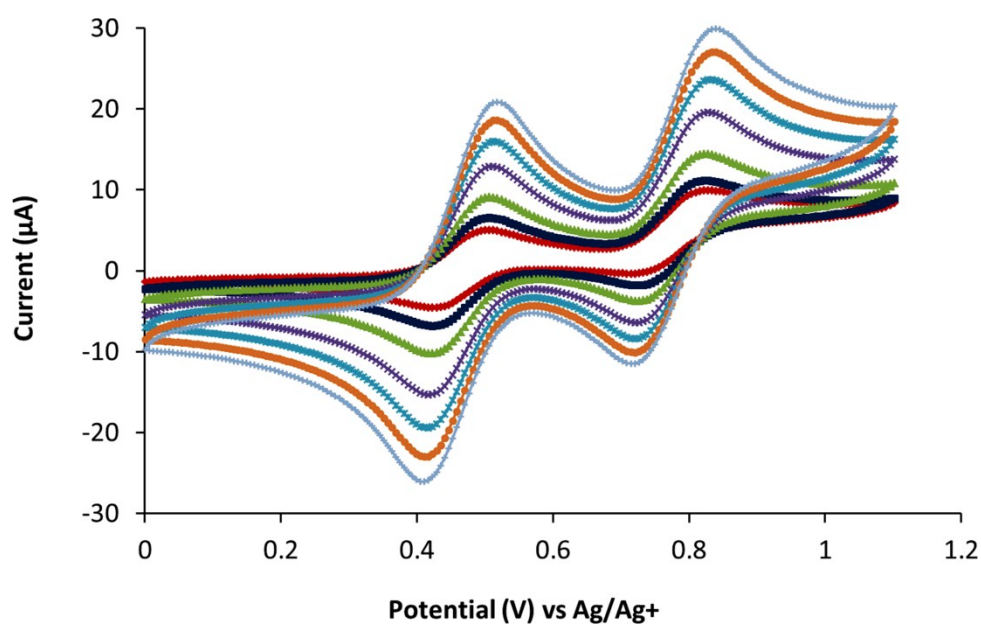

**Figure A:** Cyclic voltammogram of 10 mM ABTS **1** in [C<sub>2</sub>mim][C<sub>2</sub>SO<sub>4</sub>] with varying scan rates (from inside to outside (mV/s): 50, 100, 200, 400, 600, 800 and 1000).

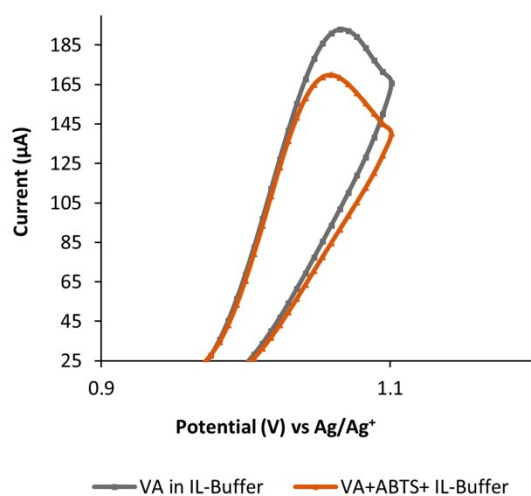

**Figure B:** Cyclic voltammograms of 13.8mM veratryl alcohol **4**, 13.8 mM veratryl alcohol **4** mixed with 1 mM ABTS **1** in 15% (v/v) [C<sub>2</sub>mim][C<sub>2</sub>SO<sub>4</sub>] in 0.1 M sodium acetate buffer (pH 4.5) recorded at a scan rate of 10 mV/s with current above 25 μA between 0.9 and 1.1 V.

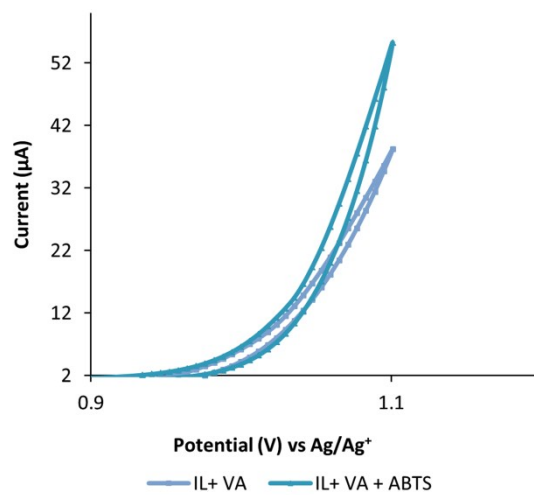

**Figure C:** Cyclic voltammograms of 13.76 mM veratryl alcohol **4**, 13.76 mM veratryl alcohol **4** mixed with 1 mM ABTS **1** in [C<sub>2</sub>mim][C<sub>2</sub>SO<sub>4</sub>] recorded at a scan rate of 10 mV/s with current above 2.0 µA between 0.9 and 1.1 V.
